# Supplementary material for: MeMo: a hybrid SQL/XML approach to metabolomic data management for functional genomics
Source: Springer Nature journal article supplement (doi:10.1186/1471-2105-7-281), 2006-06-05
Supplement: 12859_2005_1020_MOESM4_ESM.pdf [file 12859_2005_1020_MOESM4_ESM.pdf]

|     |             |     |             |      |      |             |     |      |     |     |
|-----|-------------|-----|-------------|------|------|-------------|-----|------|-----|-----|
| ID  | Y_1         | ... | Y_30        | Y_31 | Y_32 | Y_33        | ... | Y_39 | ... | Y_n |
| id1 | <i>NULL</i> | ... | <i>NULL</i> | 1020 | 2847 | <i>NULL</i> | ... | 3632 | ... | ... |
