# Supplementary material for: MeMo: a hybrid SQL/XML approach to metabolomic data management for functional genomics
Source: Springer Nature journal article supplement (doi:10.1186/1471-2105-7-281), 2006-06-05
Supplement: 12859_2005_1020_MOESM5_ESM.pdf [file 12859_2005_1020_MOESM5_ESM.pdf]

| x   | y           |
|-----|-------------|
| 30  | <i>NULL</i> |
| 31  | 1020        |
| 32  | 2847        |
| 33  | <i>NULL</i> |
| ... | ...         |
| 38  | <i>NULL</i> |
| 39  | 3632        |
| ... | ...         |
| 271 | 1661        |
| 272 | 1614        |
| 273 | 402         |
| 274 | <i>NULL</i> |
| ... | ...         |
| 600 | <i>NULL</i> |

→ #1

→ 1020

→ 2847

} → #6

→ +785

→ ...

→ 1661

→ -47

→ 402

} → #327
